# Supplementary material for: Effect of early parenteral nutrition versus enteral nutrition alone on all-cause mortality in critically ill adults: A systematic review and meta-analysis
Source: Research Square preprint supplement (doi:10.21203/rs.3.rs-5646241/v1), 2024-12-24
Supplement: Supplementary file 1 [file 923cc50177ae1d29399156ce.docx]

**Search details**

*Medline via Pubmed*

#1 intensive care units [MeSH Terms] OR critical care [Title/Abstract] OR critical illness [Title/Abstract] OR critically ill [Title/Abstract] OR intensive care [Title/Abstract] OR ICU [Title/Abstract]

#2 parenteral nutrition [MeSH Terms] OR parenteral nutrition [Title/Abstract] OR parenteral, nutrition [Title/Abstract] OR combined enteral and parenteral nutrition [Title/Abstract] OR supplemental parenteral nutrition [Title/Abstract] OR PN [Title/Abstract]

#3 enteral nutrition [MeSH Terms] OR enteral nutrition [Title/Abstract] OR enteral, nutrition [Title/Abstract] OR tube feeding [Title/Abstract] OR enteral feeding [Title/Abstract] OR EN [Title/Abstract]

#4 randomized controlled trial [MeSH Terms] OR randomized controlled trial [Title/Abstract] OR clinical trial [Title/Abstract] OR study [Title/Abstract]

#5 humans [MeSH Terms] AND adult [MeSH Terms] NOT infant [MeSH Terms]

Search: #1 AND #2 AND #3 AND #4 AND #5

*Web of Science*

Search: ((((("intensive care units"[MeSH Terms] OR "critical care"[Title/Abstract] OR "critical illness"[Title/Abstract] OR "ICU"[Title/Abstract] OR "critically ill"[Title/Abstract] OR "intensive care"[Title/Abstract]) AND ("parenteral nutrition"[MeSH Terms] OR "parenteral nutrition"[Title/Abstract] OR "parenteral nutrition"[Title/Abstract] OR "supplemental parenteral nutrition"[Title/Abstract] OR "SPN"[Title/Abstract] OR ("combined enteral"[Title/Abstract] AND "parenteral nutrition"[Title/Abstract]) OR "PN"[Title/Abstract]) AND ("enteral nutrition"[MeSH Terms] OR "enteral nutrition"[Title/Abstract] OR "enteral nutrition"[Title/Abstract] OR "enteral feeding"[Title/Abstract] OR "tube feeding"[Title/Abstract] OR "EN"[Title/Abstract]) AND ("randomized controlled trials as topic"[MeSH Terms] OR "randomized controlled trial"[Title/Abstract] OR "clinical trial"[Title/Abstract] OR "RCT"[Title/Abstract] OR "Study"[Title/Abstract]) AND ("clinical trial"[Publication Type] OR "randomized controlled trial"[Publication Type]))) NOT (Newborn Infant)) NOT (Neonate)) NOT (Infant) Filters: Clinical Trial, Randomized Controlled Trial

*Cochrane Library*

#1(intensive care units): ti, ab, kw OR ( critical llness ): ti, ab, kw OR ( critically ill ): ti, ab, kw

#2 (parenteral nutrition): ti, ab, kw OR (combined enteral and parenteral nutrition) :ti, ab, kw OR ( supplemental parenteral nutrition )ti, ab, kw

#3 (enteral nutrition )ti, ab, kw OR (enteral feeding )ti, ab, kw OR("tube - feeding"): ti, ab, kw

#4 ("randomized - controlled trial"): ti, ab, kw OR ( clinical trial) : ti , ab , kw OR ("randomized - controlled trials"): ti, ab, kw

#5 (humans): ti , ab , kw OR (adult): ti , ab , kw NOT ("infant care unit "): ti , ab , kw

Search: #1 AND #2 AND #3 AND #4 AND #5

*Embase*

#1 (parenteral nutrition'/expOR'parenteral nutrition' OR 'supplemental parenteral nutrition':ti,ab,kw OR('combined enteral':ti,ab,kw AND 'parenteral nutrition':ti,ab,kw)) AND pn :ti,ab,kw

#2 'enteric feeding/exp OR'enteric feeding' OR 'enteric feeding':ti,ab,kw OR 'feeding tube':ti,ab,kw OR'nutrition supplement':ti,ab,kw OR 'enteral nutrition':ti,ab,kw

#3 'intensive care unit OR 'intensive care':ab,ti OR 'intensive care unit'/exp OR 'critical illness':ti,ab,kw OR 'critically ill':ti,ab,kw OR icu:ti,ab,kw

#4 ('randomized controlled trial'/exp OR 'randomized controlled trial' OR'randomized controlled trial':ti,ab,kw OR rct:ti,ab.kw)AND 'clinical trial':ti,ab,kw

#5 ('adult'/exp OR adult OR adult:ti,ab,kw) NOT infant:ti,ab,kw

Search: #1 AND #2 AND #3 AND #4 AND #5
